# Supplementary material
Source: Research Square preprint supplement (doi:10.21203/rs.3.rs-9549855/v1)

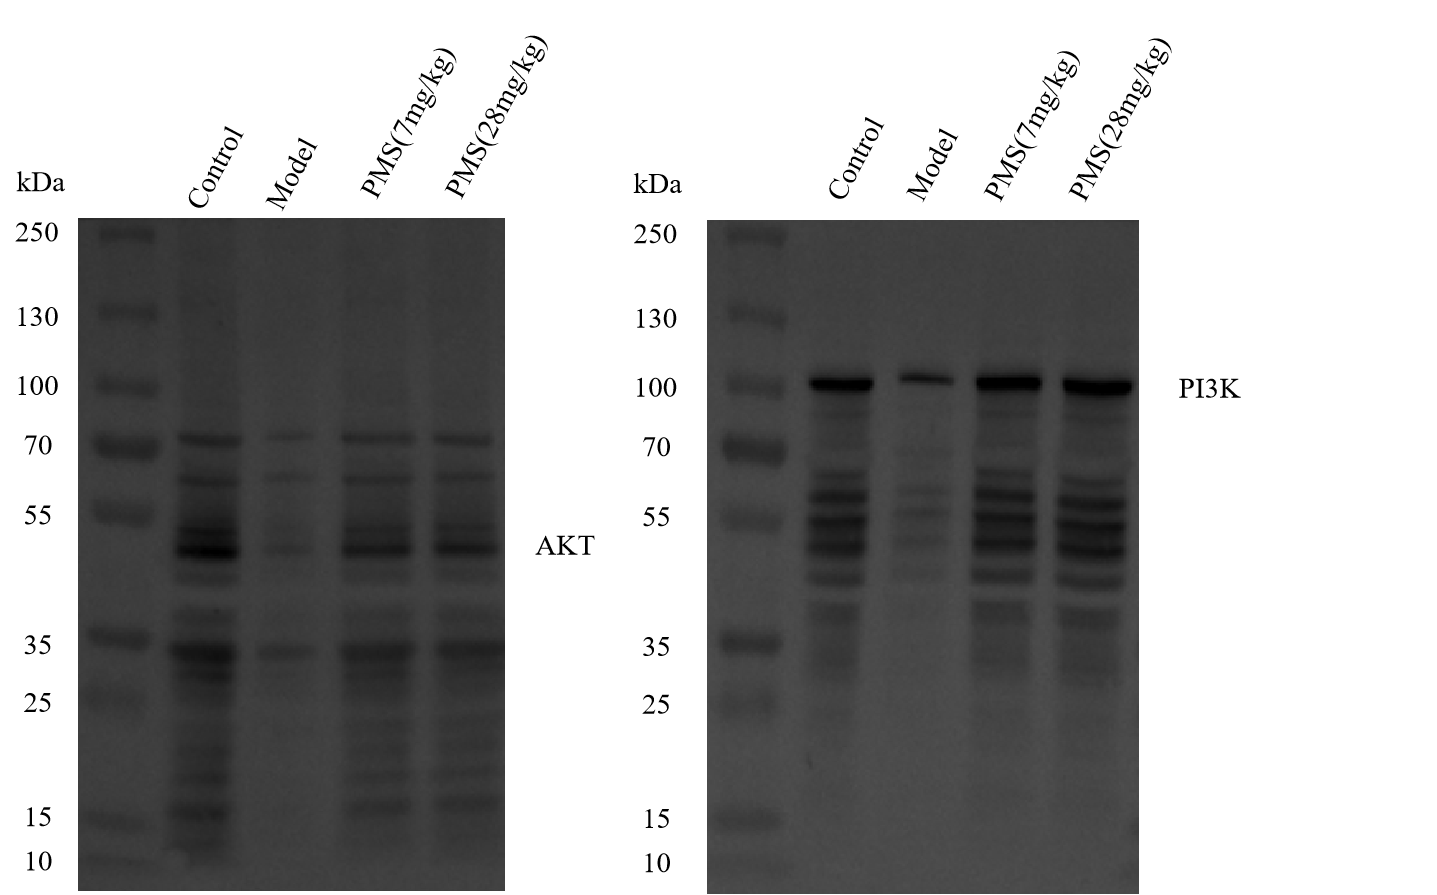


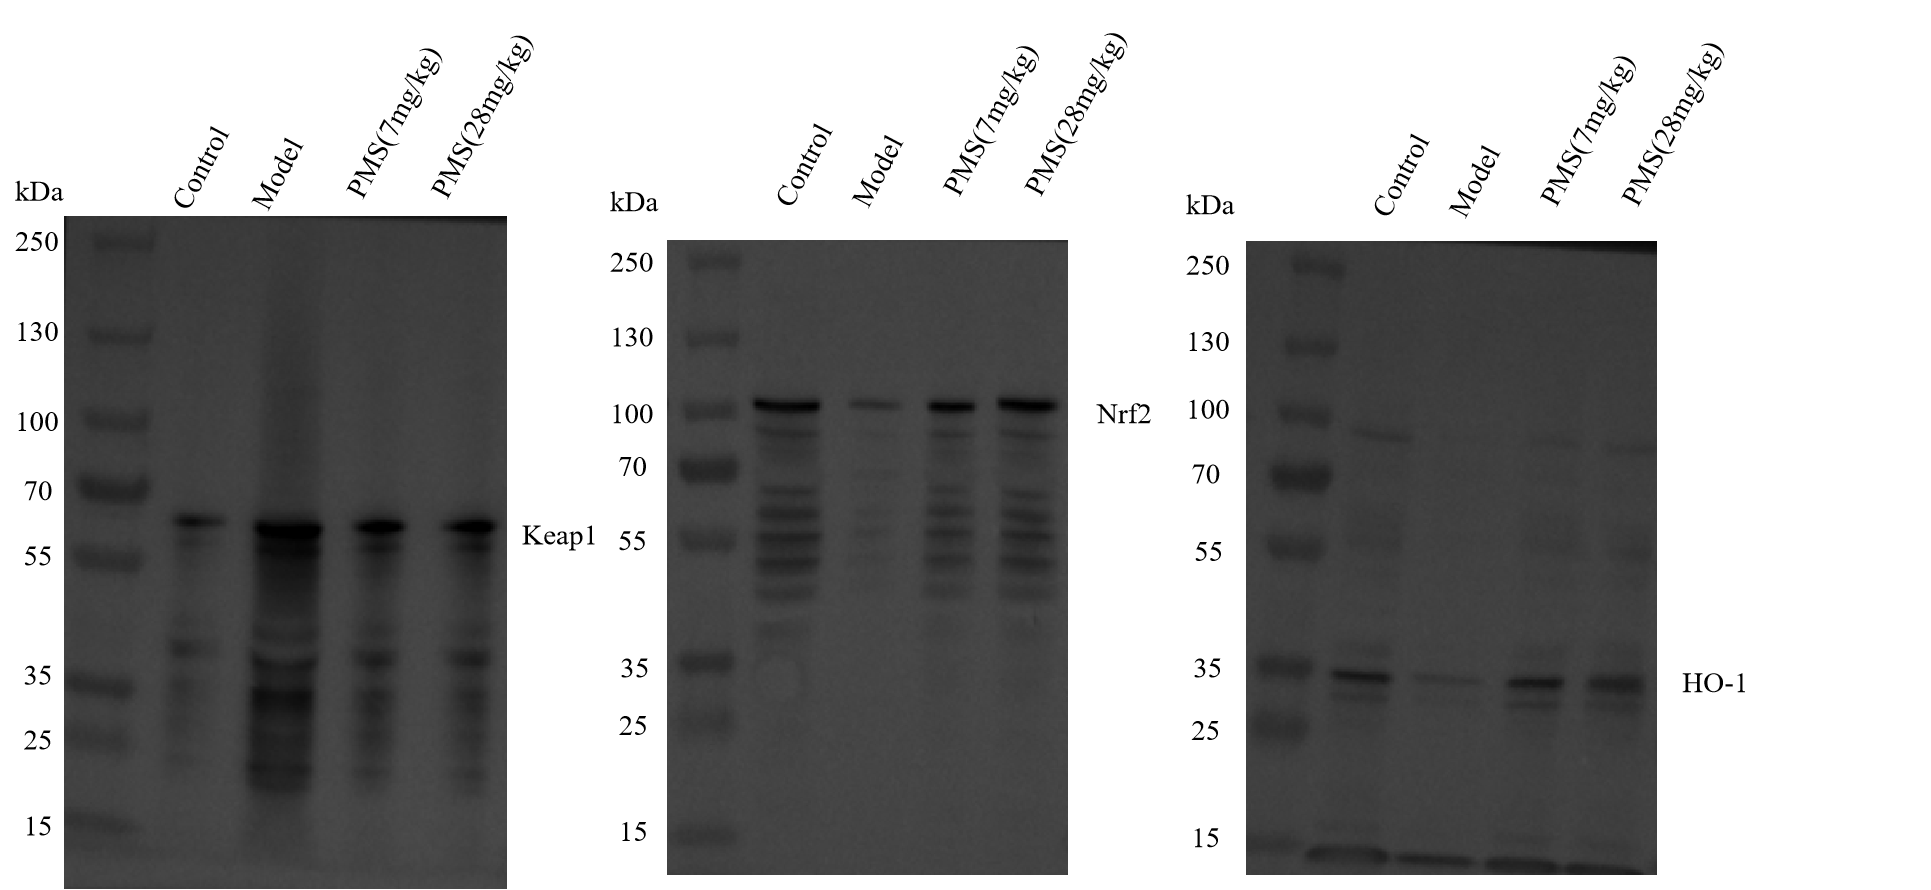


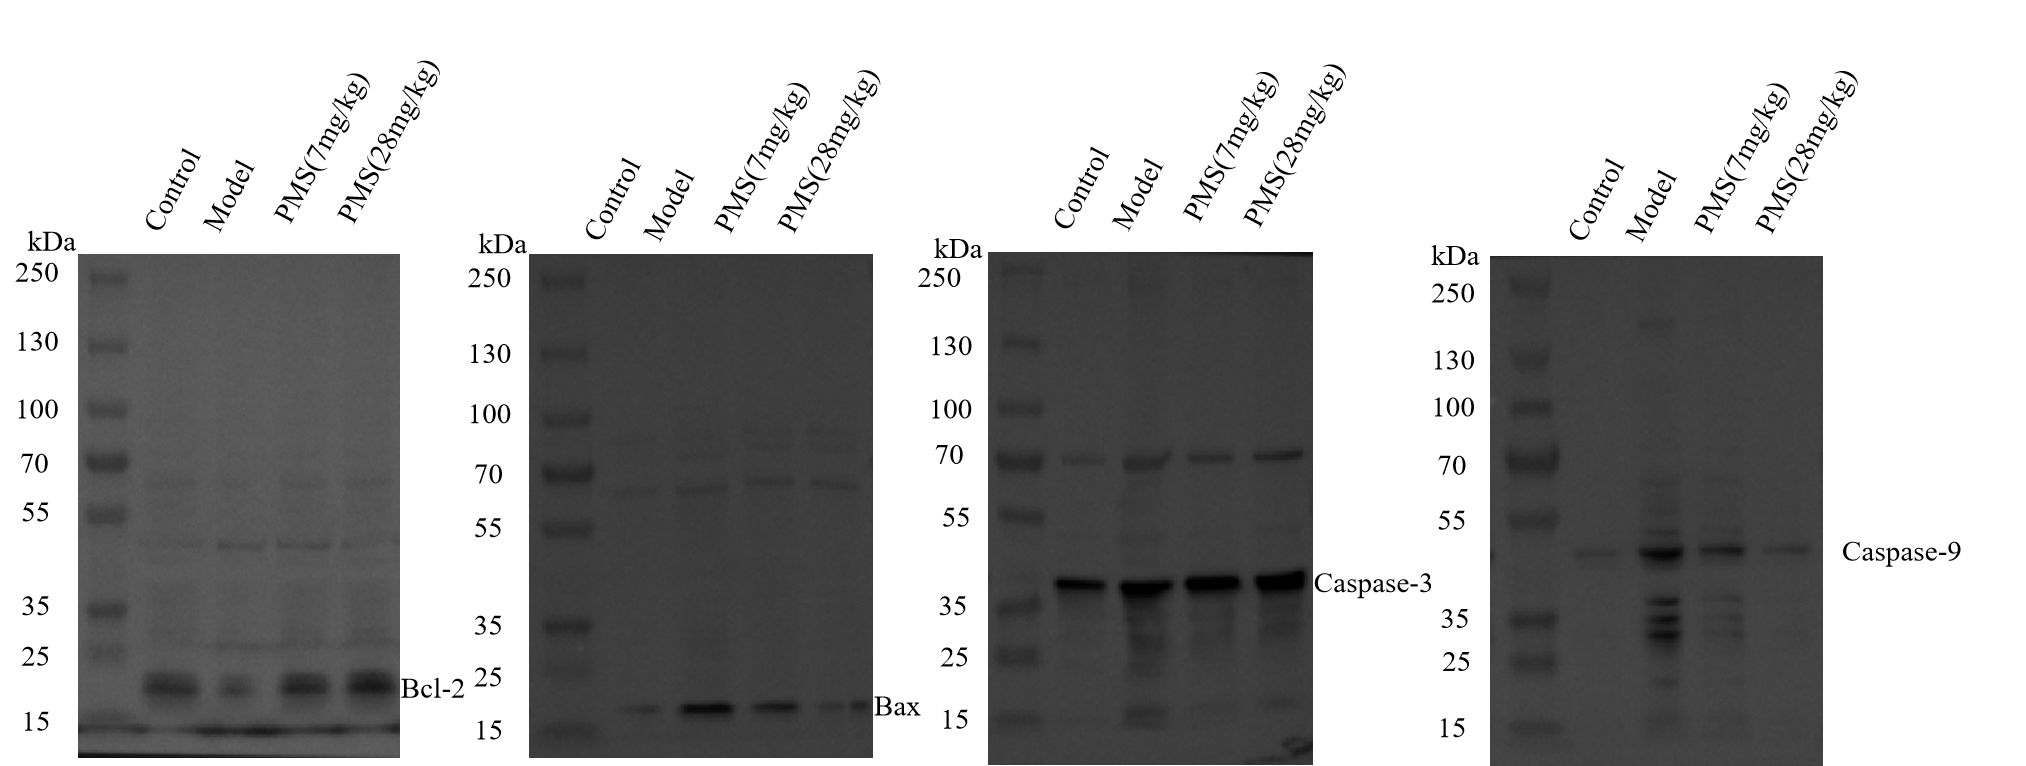


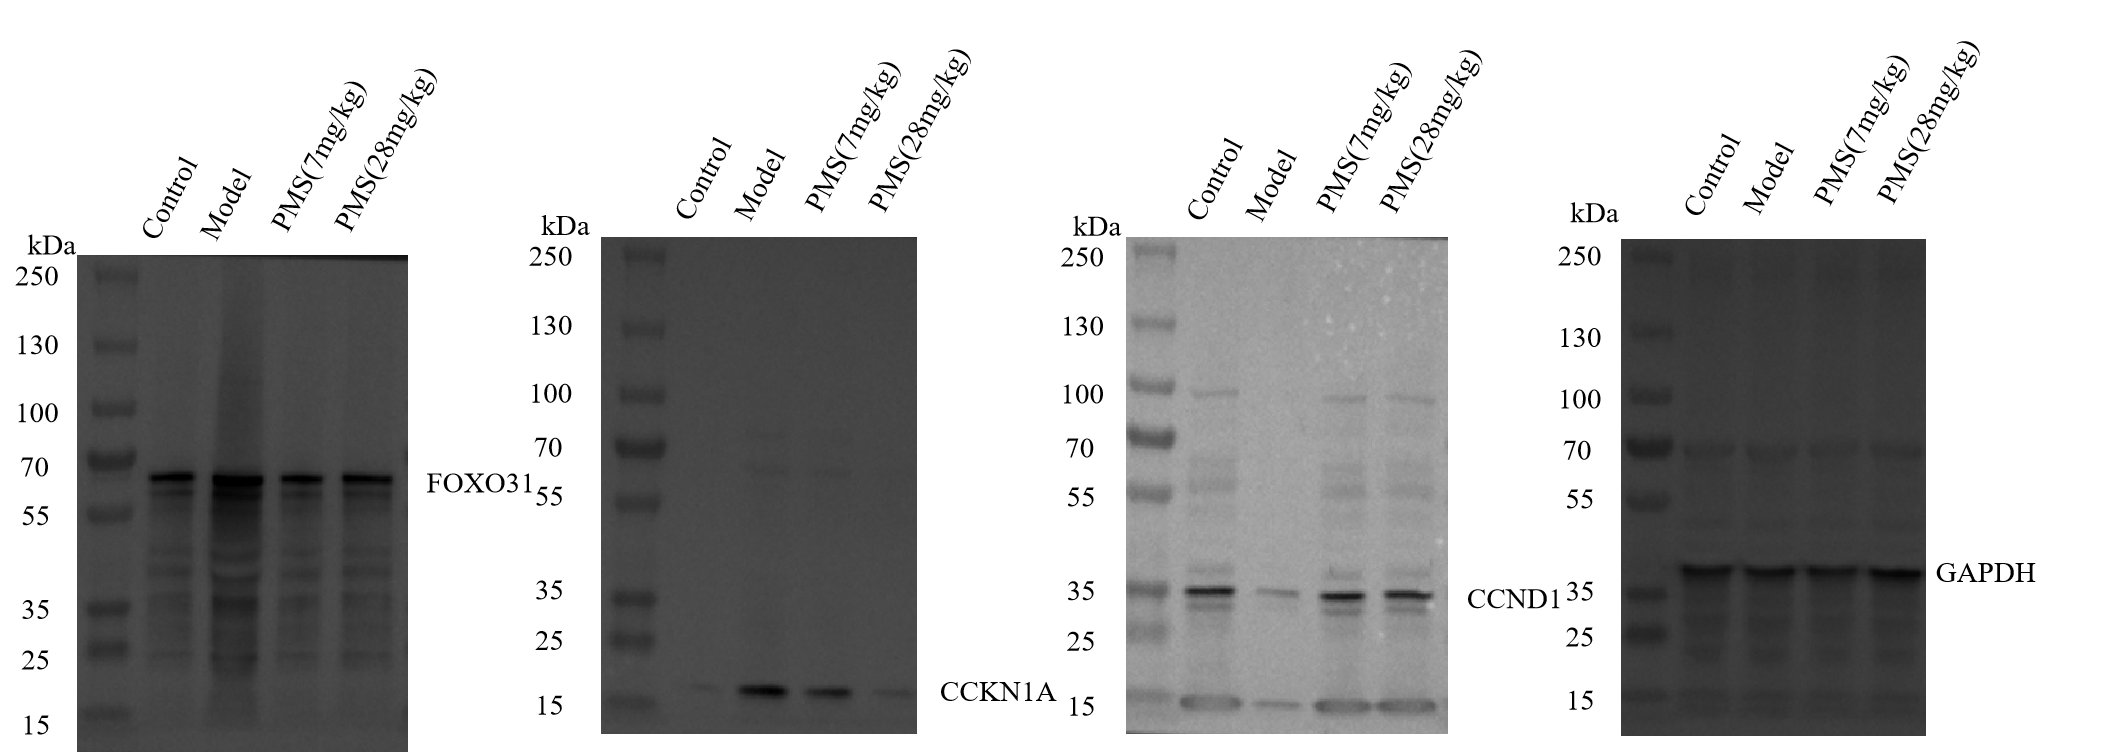

Supplement: Supplementary file 1 [file 9601f23aa6440727be88eade.docx]
